# Supplementary material
Source: PubMed Central journal article supplement (PMC6641459)
Supplement: ao7b01333_si_001.pdf [file ao7b01333_si_001.pdf]

## **Restriction enzymes as a target for DNA based sensing and structural rearrangement: Supplemental Information**

Susan Buckhout-White<sup>1\*</sup>, Chanel Person<sup>1</sup>, Igor L. Medintz<sup>1</sup>, Ellen R. Goldman<sup>1</sup>

1 Center for Bio/Molecular Science and Engineering, Code 6900  
U.S. Naval Research Laboratory  
Washington, DC 20375, USA

**Table SI. DNA Sequences**

| <b>Name</b>             | <b>Sequence</b>                                                        | <b>Modification</b> | <b>T<sub>m</sub> (1X TAE<br/>12.5 mM MgCl<sub>2</sub>)</b> | <b>Source</b> |
|-------------------------|------------------------------------------------------------------------|---------------------|------------------------------------------------------------|---------------|
| <b>Arm 1</b>            | GGTTCAGCCGCAATCCGGCACAGCTATAATAA*GAGTT<br>TGATGAAATGGAGCGGACGTGAGATGG  | *Internal Cy3       | 79.0                                                       | IDT           |
| <b>Arm2</b>             | GCAAGACTCGTGCTCAGGTCCTAAGTTGGTTCT*ACCGC<br>ATGGTATATGGGGCTTACGGTGGTGCG | *Internal Cy3.5     | 79.7                                                       | Operon        |
| <b>Arm 3</b>            | GGATCAGAGCTGGACGGGAGCCTATCGGGTAG*TTATG<br>TTGTTCGCTGGTGTACTGCATCCAGG   | *Internal Cy5       | 79.3                                                       | IDT           |
| <b>Cap 1</b>            | CCATCTCACGTCCGCTGGATTGCGGCTGAACC                                       |                     | 76.7                                                       | IDT           |
| <b>Cap 2</b>            | CGCACCACCGTAAGCCTGAGCACGAGTCTTGC                                       |                     | 76.5                                                       | IDT           |
| <b>Cap 3</b>            | CCTGGATGCAGTAACACGTCCAGCTCTGATCC                                       |                     | 73.9                                                       | IDT           |
| <b>Link1<br/>Xba I</b>  | GCCGGAGACCATATAACCATGCGGTGCTCTAGACGTTAT<br>TATAGCTGTGCC                |                     | 77.2                                                       | IDT           |
| <b>Link2<br/>Eco RI</b> | CCTGTACGCCAGCGAACAACATAACGGAATTCGCGAAC<br>CAACTTAGGACC                 |                     | 77.9                                                       | IDT           |
| <b>Link3<br/>Bam HI</b> | GATACGGACCATTTTCATCAAACCTCCGGGATCCGGCTAC<br>CCGATAGGCTCC               |                     | 78.2                                                       | IDT           |
| <b>Link1<br/>Nco I</b>  | GCCGGAGACCATATAACCATGCGGTGCCCATGGCGTTAT<br>TATAGCTGTGCC                |                     | 79.0                                                       | IDT           |
| <b>Link<br/>Xho I</b>   | GCCGGAGACCATATAACCATGCGGTGGCTCGAGCCTTAT<br>TATAGCTGTGCC                |                     | 78.5                                                       | IDT           |
| <b>Link1<br/>Sma I</b>  | GCCGGAGACCATATAACCATGCGGTGGCCCGGGCCTTAT<br>TATAGCTGTGCC                |                     | 79.8                                                       | IDT           |
| <b>Link3<br/>Sma I</b>  | GATACGGACCATTTTCATCAAACCTCGGCCCGGGCCCTAC<br>CCGATAGGCTCC               |                     | 79.5                                                       | IDT           |
| <b>Comp Xba I</b>       | CGTCTAGAGC                                                             |                     | 41.5                                                       | IDT           |
| <b>Comp Eco RI</b>      | GCGAATTC                                                               |                     | 45.4                                                       | IDT           |
| <b>Comp Bam HI</b>      | CCGGATCC                                                               |                     | 50.0                                                       | IDT           |

|                   |            |      |     |
|-------------------|------------|------|-----|
| <b>Comp Nco I</b> | CGCCATGGGC | 53.0 | IDT |
| <b>Comp Xho I</b> | GGCTCGAGCC | 49.3 | IDT |
| <b>Comp Sma I</b> | GGCCCGGGCC | 57.7 | IDT |

\*in sequence indicates modifier placement

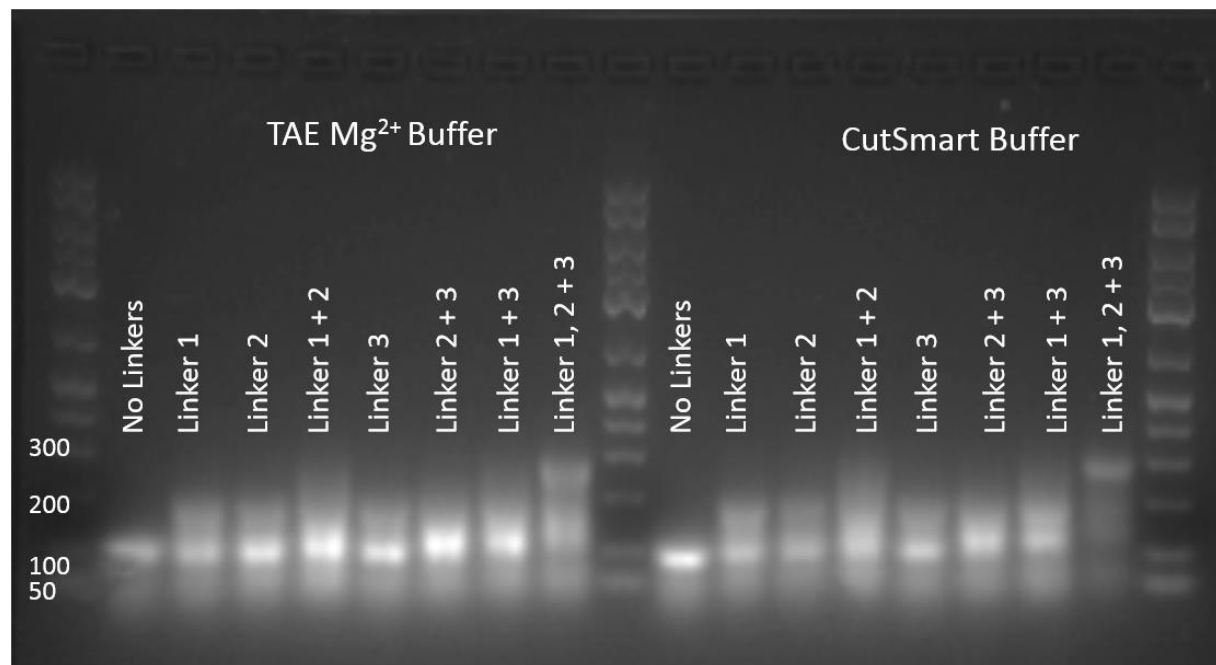

**Figure S1: Gel electrophoresis of all eight permutations in TAE with Mg and CutSmart buffer**

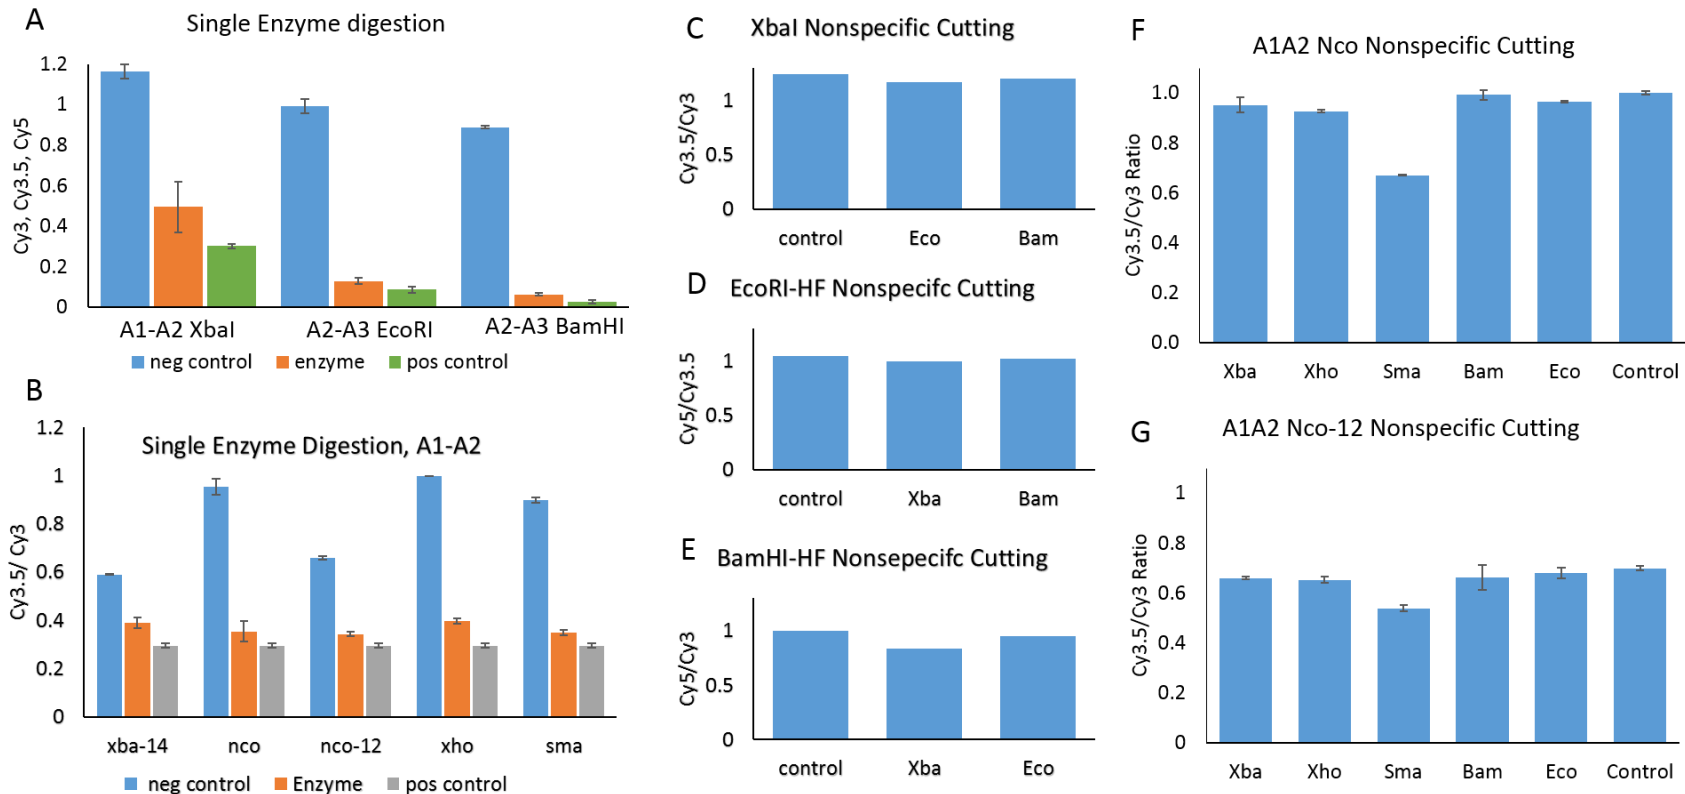

**FigureS2: A-B) enzyme cutting data for all enzymes tested. The Arms used are indicated with a negative and positive control given for each set. C-E) ratio output for non-specific enzyme assay where all other enzymes are presented against the specified sequence. F-G) Non-specific cutting assay for the NCO enzyme. This shows non-specific behavior with the Sma I enzyme in both the NCO-10 and NCO-12 assemblies.**

**Table S2. Table of all possible enzyme combinations. Bold indicates compatible sets.**

| <b>Link 1</b>  | <b>Link 2</b>   | <b>Link 3</b>   |
|----------------|-----------------|-----------------|
| NcoI-HF        | BamHI-HF        | EcoRI-HF        |
| <b>NcoI-HF</b> | <b>BamHI-HF</b> | <b>XhoI</b>     |
| NcoI-HF        | BamHI-HF        | SmaI            |
| <b>NcoI-HF</b> | <b>EcoRI-HF</b> | <b>XhoI</b>     |
| NcoI-HF        | EcoRI-HF        | SmaI            |
| NcoI-HF        | XhoI            | SmaI            |
| BamHI-HF       | EcoRI-HF        | XhoI            |
| BamHI-HF       | EcoRI-HF        | SmaI            |
| <b>XhoI</b>    | <b>SmaI</b>     | <b>BamHI-HF</b> |
| <b>XhoI</b>    | <b>EcoRI-HF</b> | <b>SmaI</b>     |

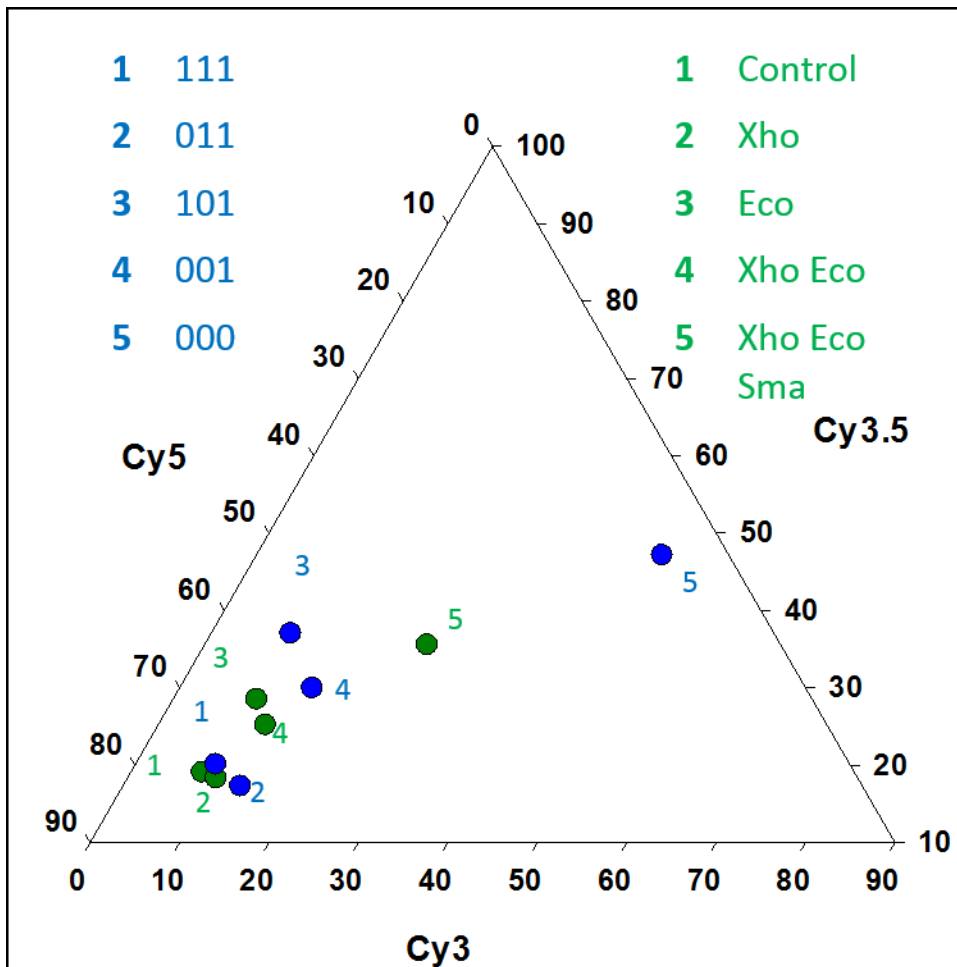

Figure S3: Ternary plot of dye contribution for the triple digestion experiment

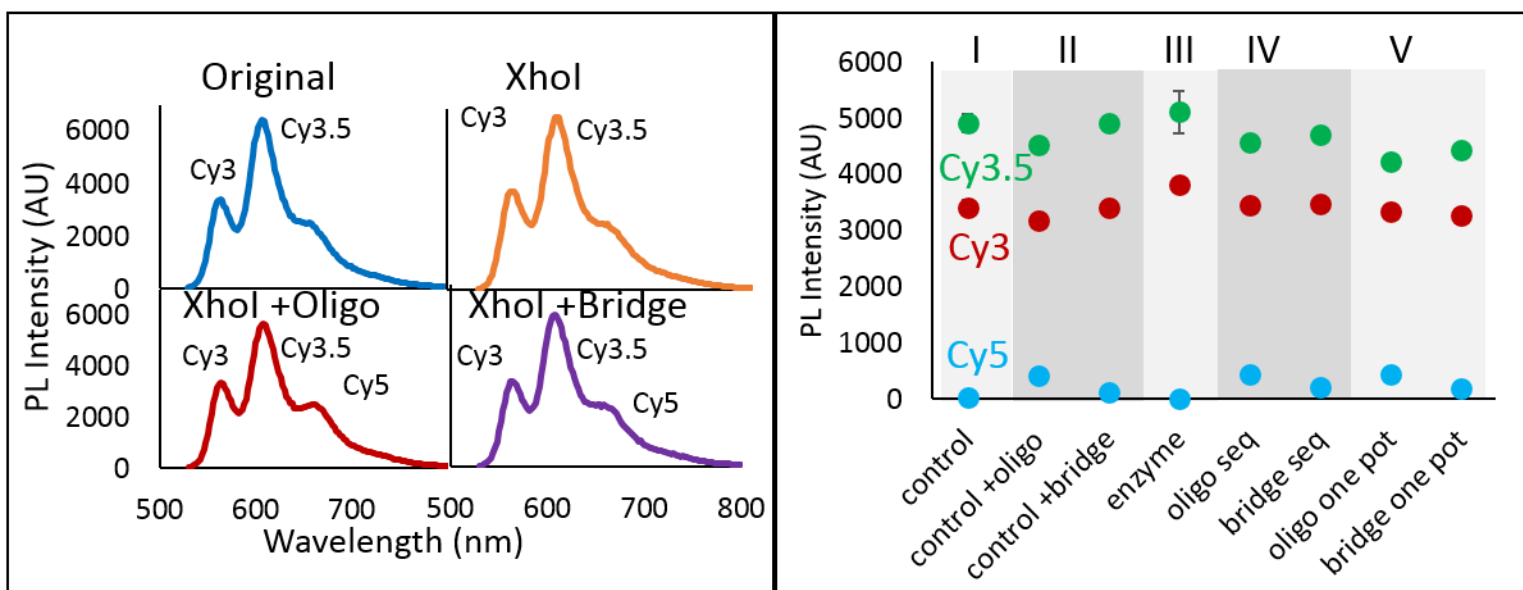

**Figure S4:** Data from the full structure enzyme cleavage and rearrangement via addition of an additional Cy5 containing DNA oligo. Left panel shows the PL Intensity of each of the structures depicted with XhoI +Oligo and XhoI + Bridge both being one pot reactions. The right panel shows PL peak height plots for each of the three dyes in the system. The addition was performed both as a one-pot reaction and a sequential reaction. The controls of the switch plus the oligo or bridge are done in the absence of enzyme and show little to no reaction without the presence of the enzyme.
